# Supplementary material
Source: PubMed Central journal article supplement (PMC11388645)
Supplement: PBI-16-1595-s002.pdf [file PBI-16-1595-s002.pdf]

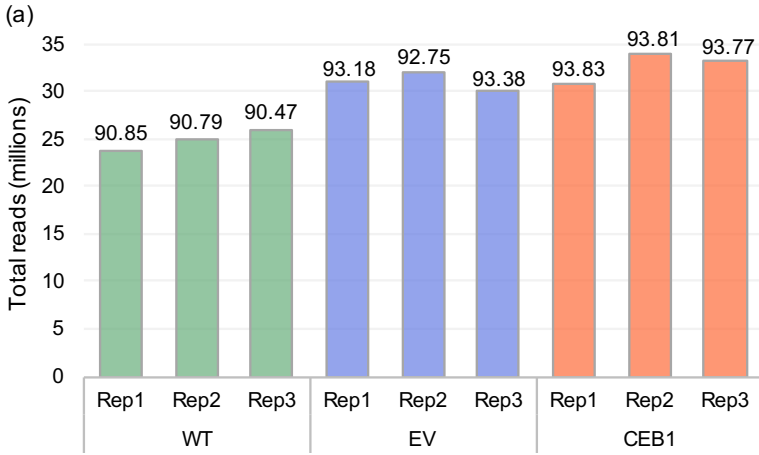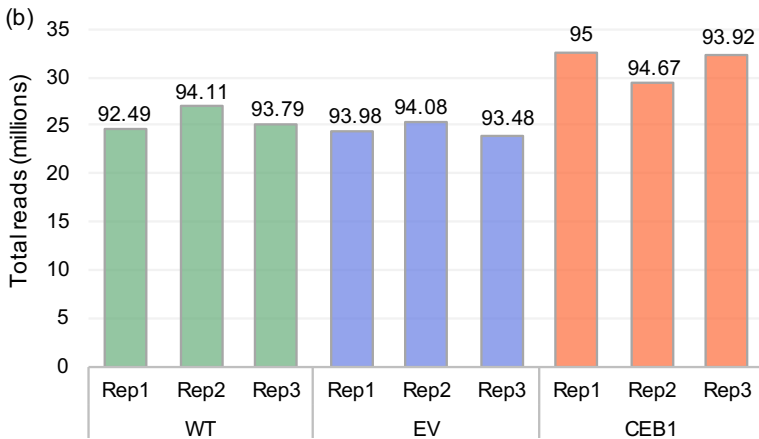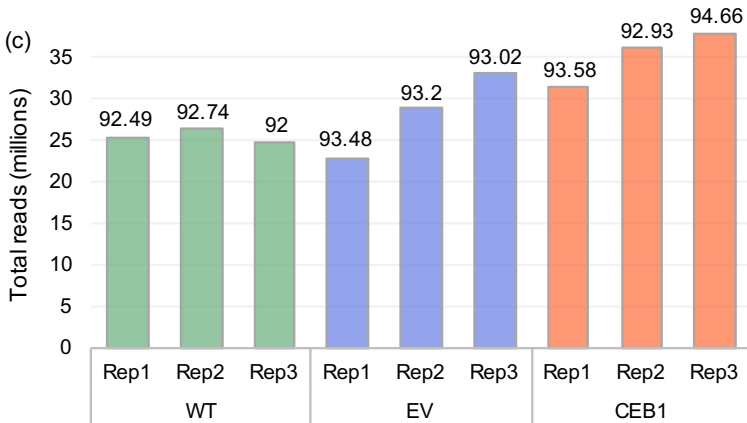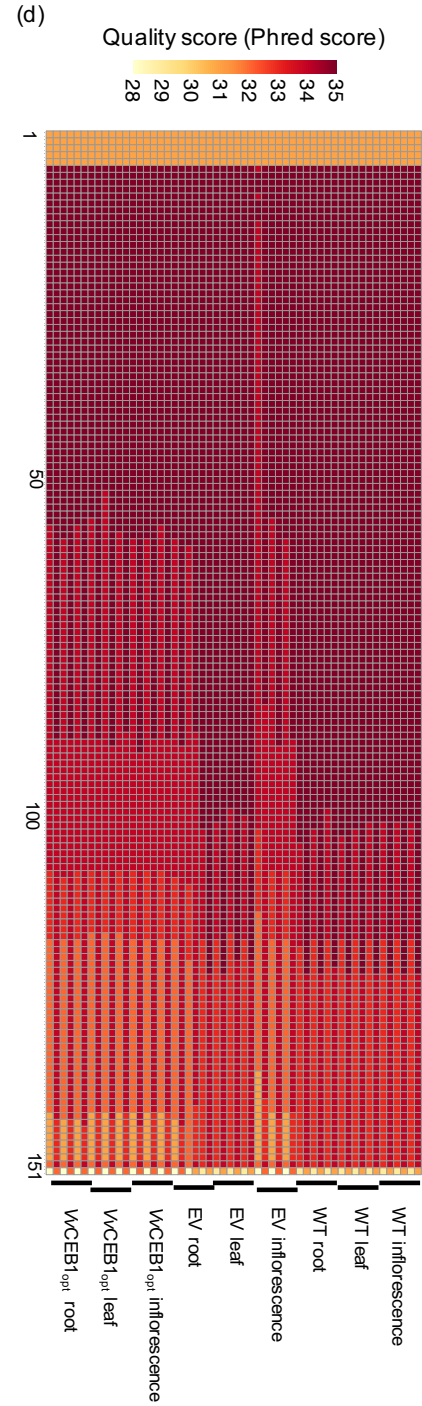

**Figure S18. Summary of total RNA-Seq read counts per tissue type, read mapping rate, and read quality for individual samples.** Each bar plot corresponds to one replication of Col-0 wild type (WT), the *35S::3xHA* empty-vector control (EV), and *VvCEB1<sub>opt</sub>*-overexpressing line (#26). Each bar indicates the number of reads in each paired-end read set after trimming low-quality reads ( $Q \geq 20$ ) using Trimmomatic (Version 0.36). The number above each bar plot indicates the read-mapping rate (%) produced using Bowtie2. (a) RNA-Seq reads from inflorescence samples. (b) RNA-Seq reads from leaf samples. (c) RNA-Seq reads from root samples. (d) Heat map indicating read quality. The color of each cell represents the Phred quality score within the range of Phred values (scale = 28-35) reflecting the base quality of the individual reads.

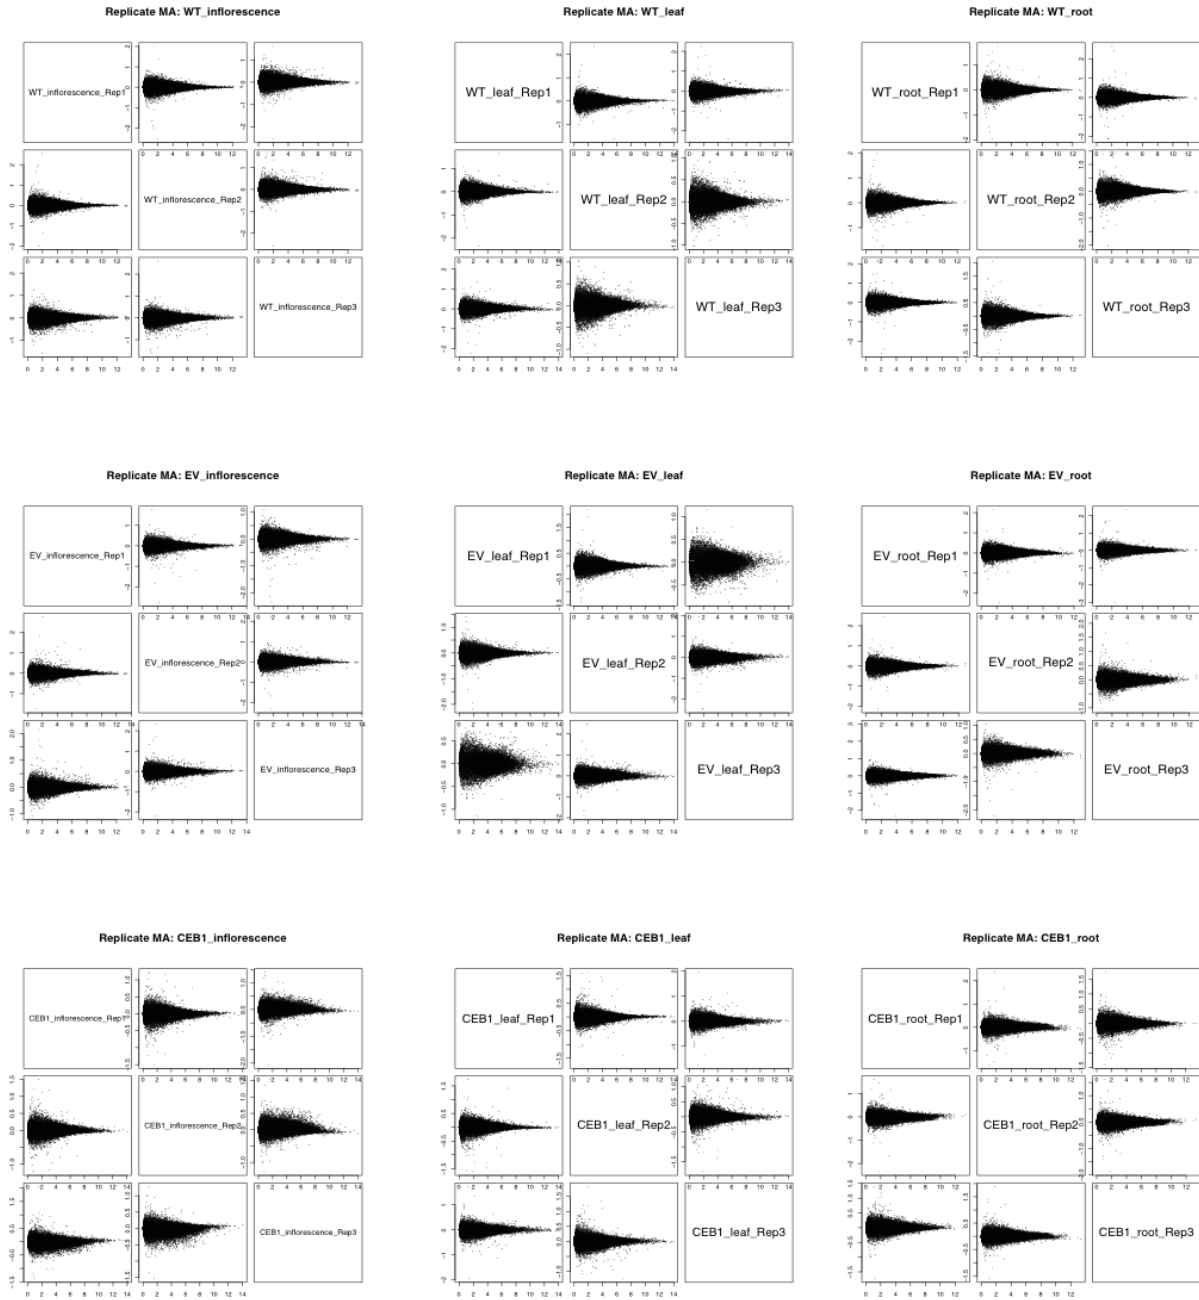

**Figure S19. Testing for two-fold differential expression within biological sample replicates between RNA-Seq samples from each organ type.** Each of the nine Bland-Altman (MA) plot provides a visual representation of the level of agreement between biological replicates obtained within each of the pair-wise sample comparisons generated by edgeR. Each plot depicts the relative differences identified as significantly different expression at 0.001 FDR and two-fold changes in gene expression are colored in red.

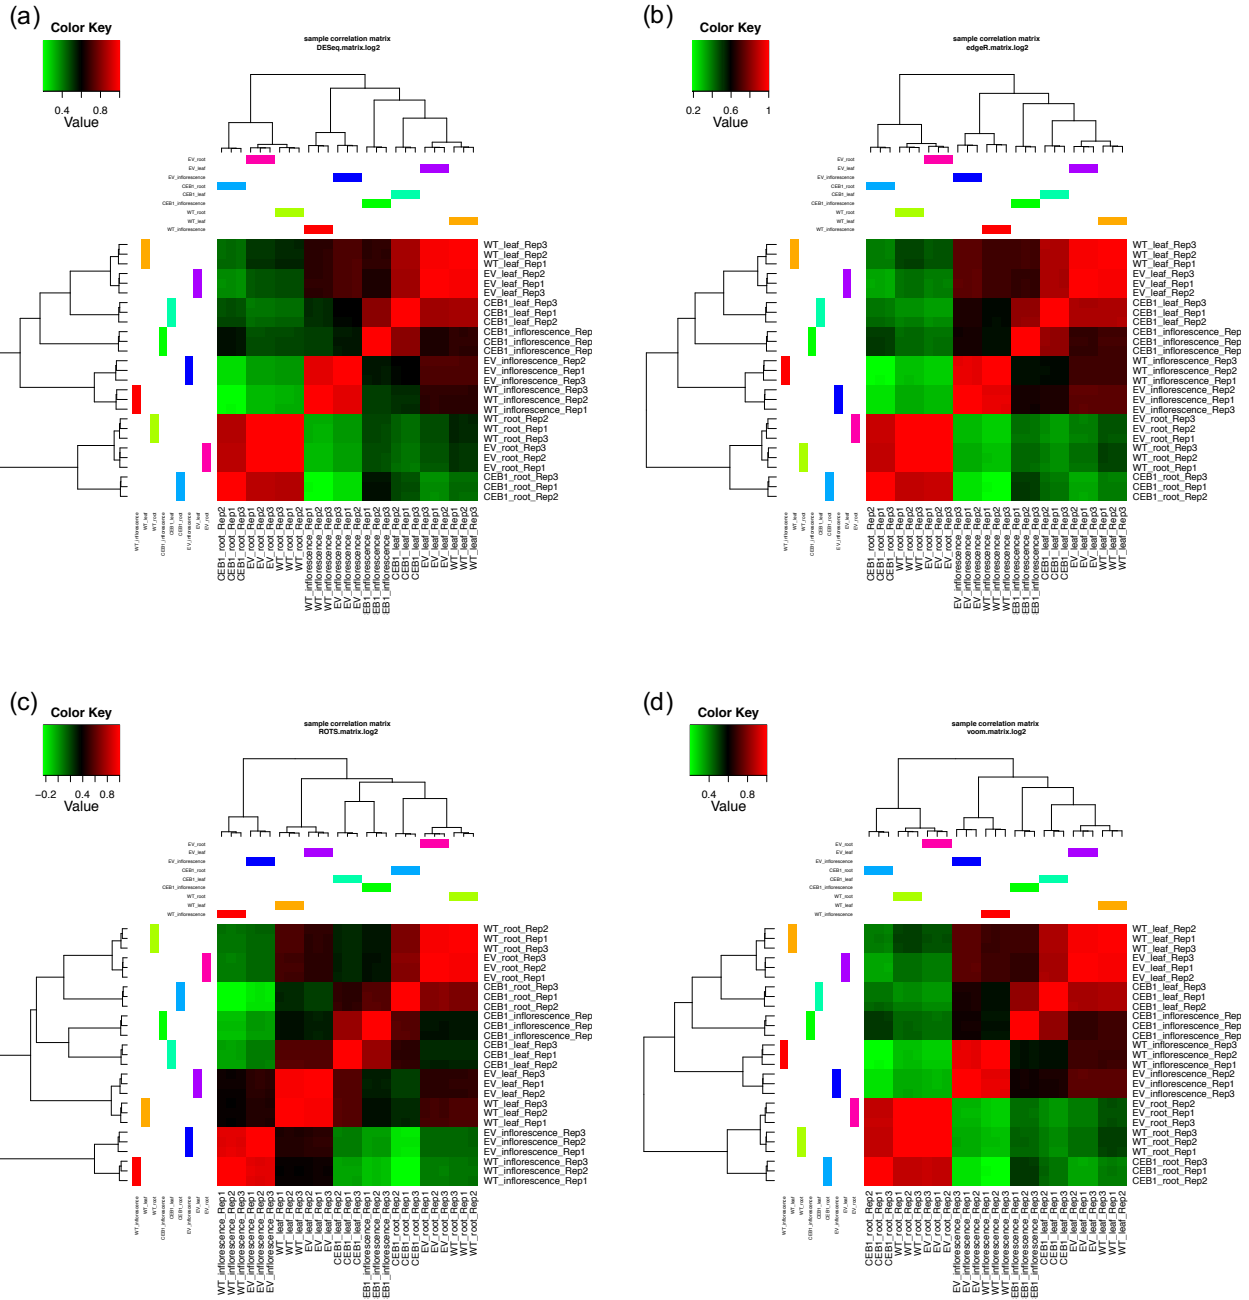

**Figure S20. RNA-Seq expression correlation matrix heat maps of RNA-Seq samples generated by four different differential expression analysis packages.** The FPKM values calculated by each package for each organ contrast were clustered with a pair-wise Pearson correlation coefficient calculated by each algorithm. The color key located on the top left corner of each heat map indicates the Pearson correlation coefficient score ranges obtained using each algorithm. The colored bars alongside the heat map show the relative clustering obtained for each of the samples. The clusters were generated using the complete linkage method. (a) Heat map generated using DESeq2. (b) Heat map generated using edgeR. (c) Heat map generated using ROTS. (d) Heat map generated using voom.

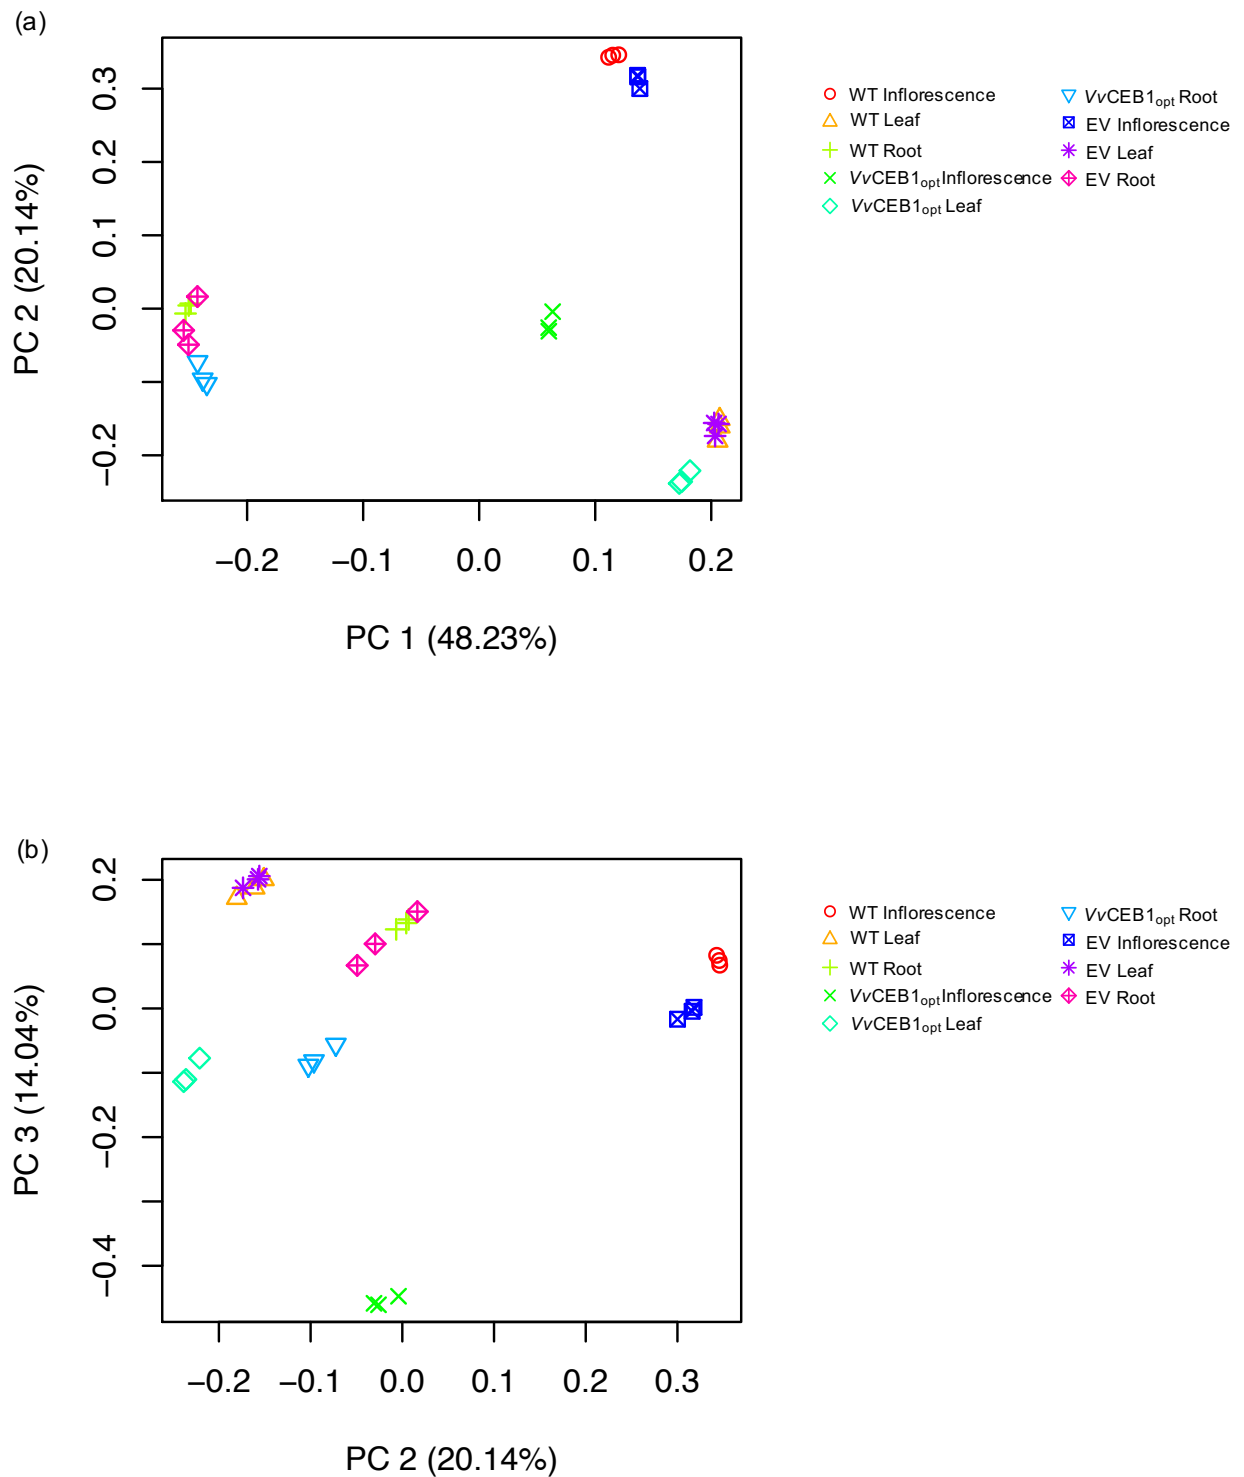

**Figure S21. Principal component analysis (PCA) of RNA-Seq expression across each of the 27 data sets.** Expression values (FPKMs) were normalized across the entire data set prior to conducting PCA for (a) PC1-2 and (b) PC2-3. Note that each tissue type grouped

together, with the exception of the inflorescence from the *VvCEB1<sub>opt</sub>*-overexpressing line (#26) in PCA1-2.

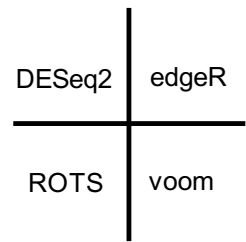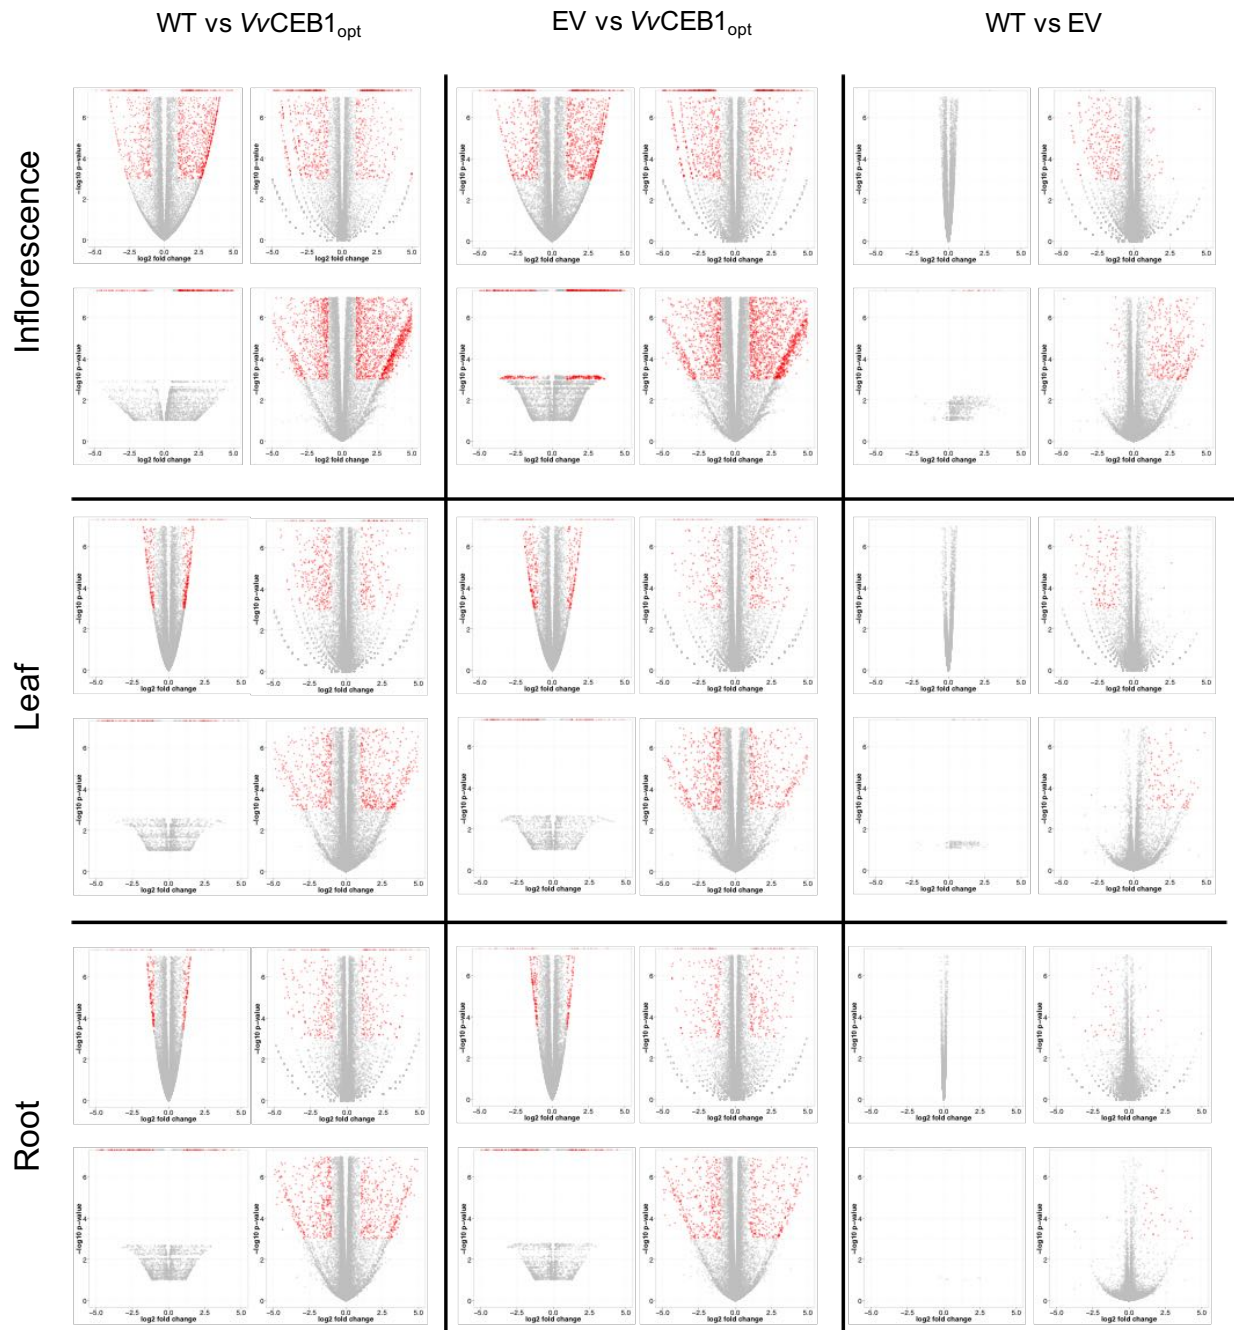

**Figure S22. Volcano plots showing differential mRNA expression within various dataset comparisons.** Log-fold changes indicated the relative gene expression within each comparison pair. The statistical significance shows negative logarithm. The mRNA expression changes that were statistically significant ( $p\text{-value} \leq 0.001$  and  $\geq 2$  fold) are

colored in red. The key in top right corner indicates the four different differentially expressed gene (DEG) programs used for each comparison (e.g., DESeq2, edgeR, ROTS, and voom).



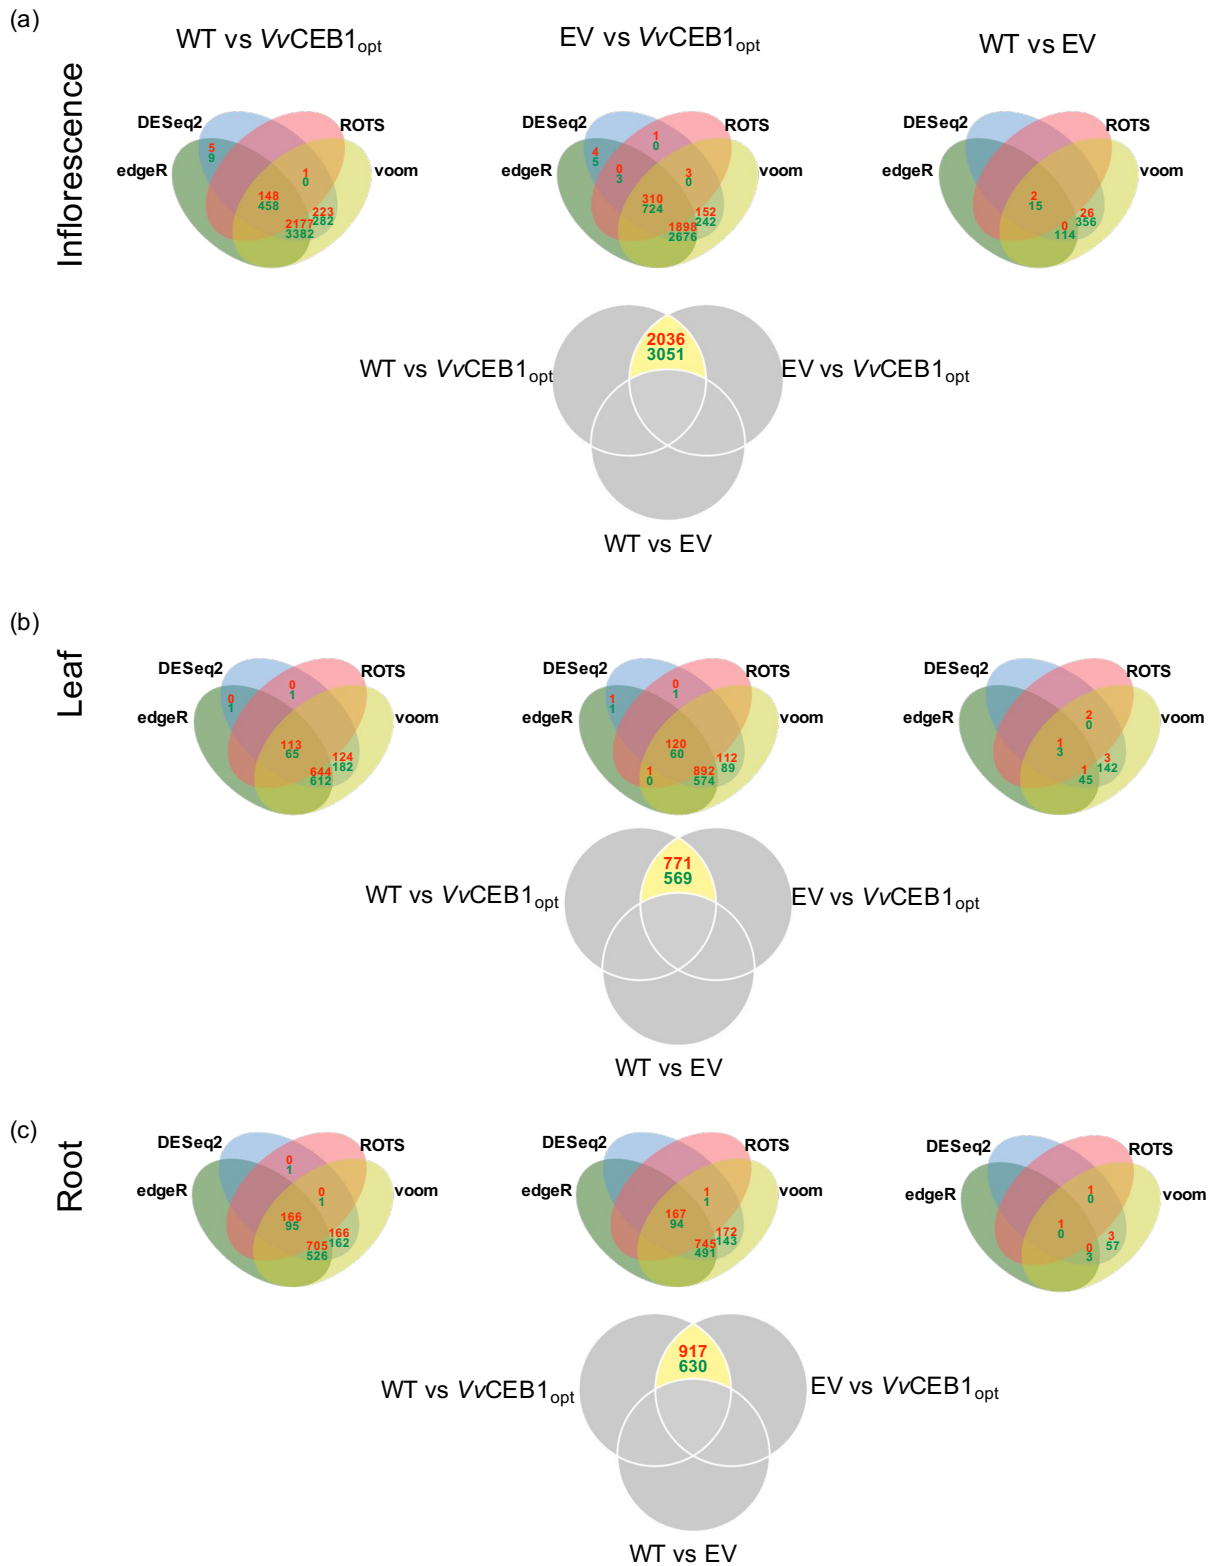

**Figure S23. Venn diagrams showing the number of differentially expressed genes within (a) inflorescence, (b) leaf, and (c) root with statistically significant fold-changes in mRNA expression between Col-0 wild type (WT) compared with *VvCEB1*<sub>opt</sub>, 35S::3xHA empty-vector control (EV) compared with *VvCEB1*<sub>opt</sub>, Col-0 WT compared**

**with EV, and all possible combinations of the pairs of genotypes.** Four-way Venn diagrams were used to show the intersection of the differentially expressed genes identified by more than two tools when comparisons were made using DESeq2, edgeR, ROTS, or voom. Three-way Venn diagrams were used to show the intersection of differentially expressed genes between WT compared with *VvCEB1<sub>opt</sub>*, and EV compared with *VvCEB1<sub>opt</sub>*, which showed no overlap in gene expression with WT compared with EV.

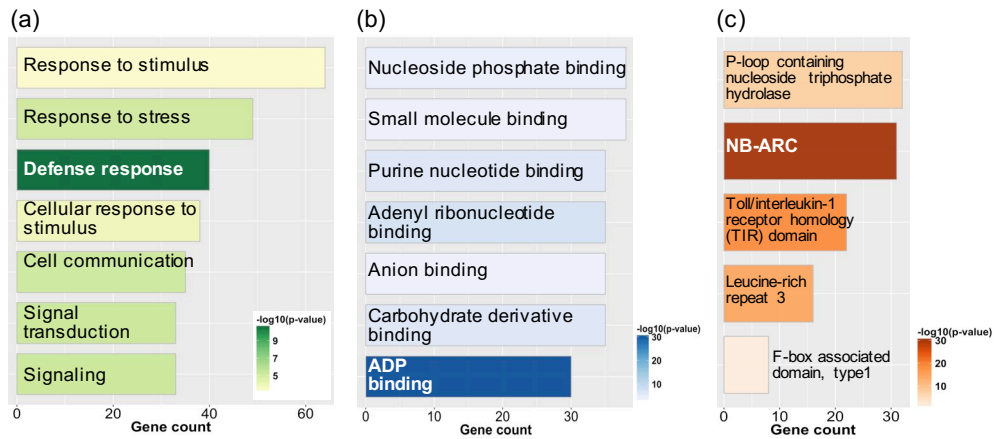

**Figure S24. The consensus set of 227 genes with increased transcript abundance showed enrichment for gene ontology (GO) terms involved in several biological processes.** Analysis using ThaleMine at the Araport database (Krishnakumar et al., 2015) revealed (a) biological process analysis revealed enrichment of genes involved in responses to environmental stress and stimulation, with significant enrichment of genes in cell communication and signaling and especially defense response functions. (b) Molecular function analysis revealed enrichment of genes involved in small molecule binding, anion and carbohydrate derivative binding, and nucleoside binding, with a strong enrichment in ADP binding. (c) Protein domain enrichment analysis revealed enrichment of genes with P-loop nucleoside triphosphate hydrolase activities (NTPase), NB-ARC (nucleotide-binding adaptor shared by *APAF-1*, R proteins, and *CED-4*) domains from resistance proteins involved in plant innate immunity, Toll/interleukin-1 receptor homolog (*TIR*) domains of nucleotide binding site-leucine-rich (*LRR*) repeat (*NBS-LRR*) proteins that recognize pathogen-derived effector molecules, leucine-rich repeat domains of disease resistance proteins, and F-box associated domains. Significantly over-represented terms within each database were defined by their hypergeometric distribution after applying the Holm-Bonferroni FDR correction for multiple comparisons with a significance threshold ( $p < 0.05$ ). Bar graph size and color indicates the number of genes associated with enrichment terms and their corrected  $P$  values, respectively.

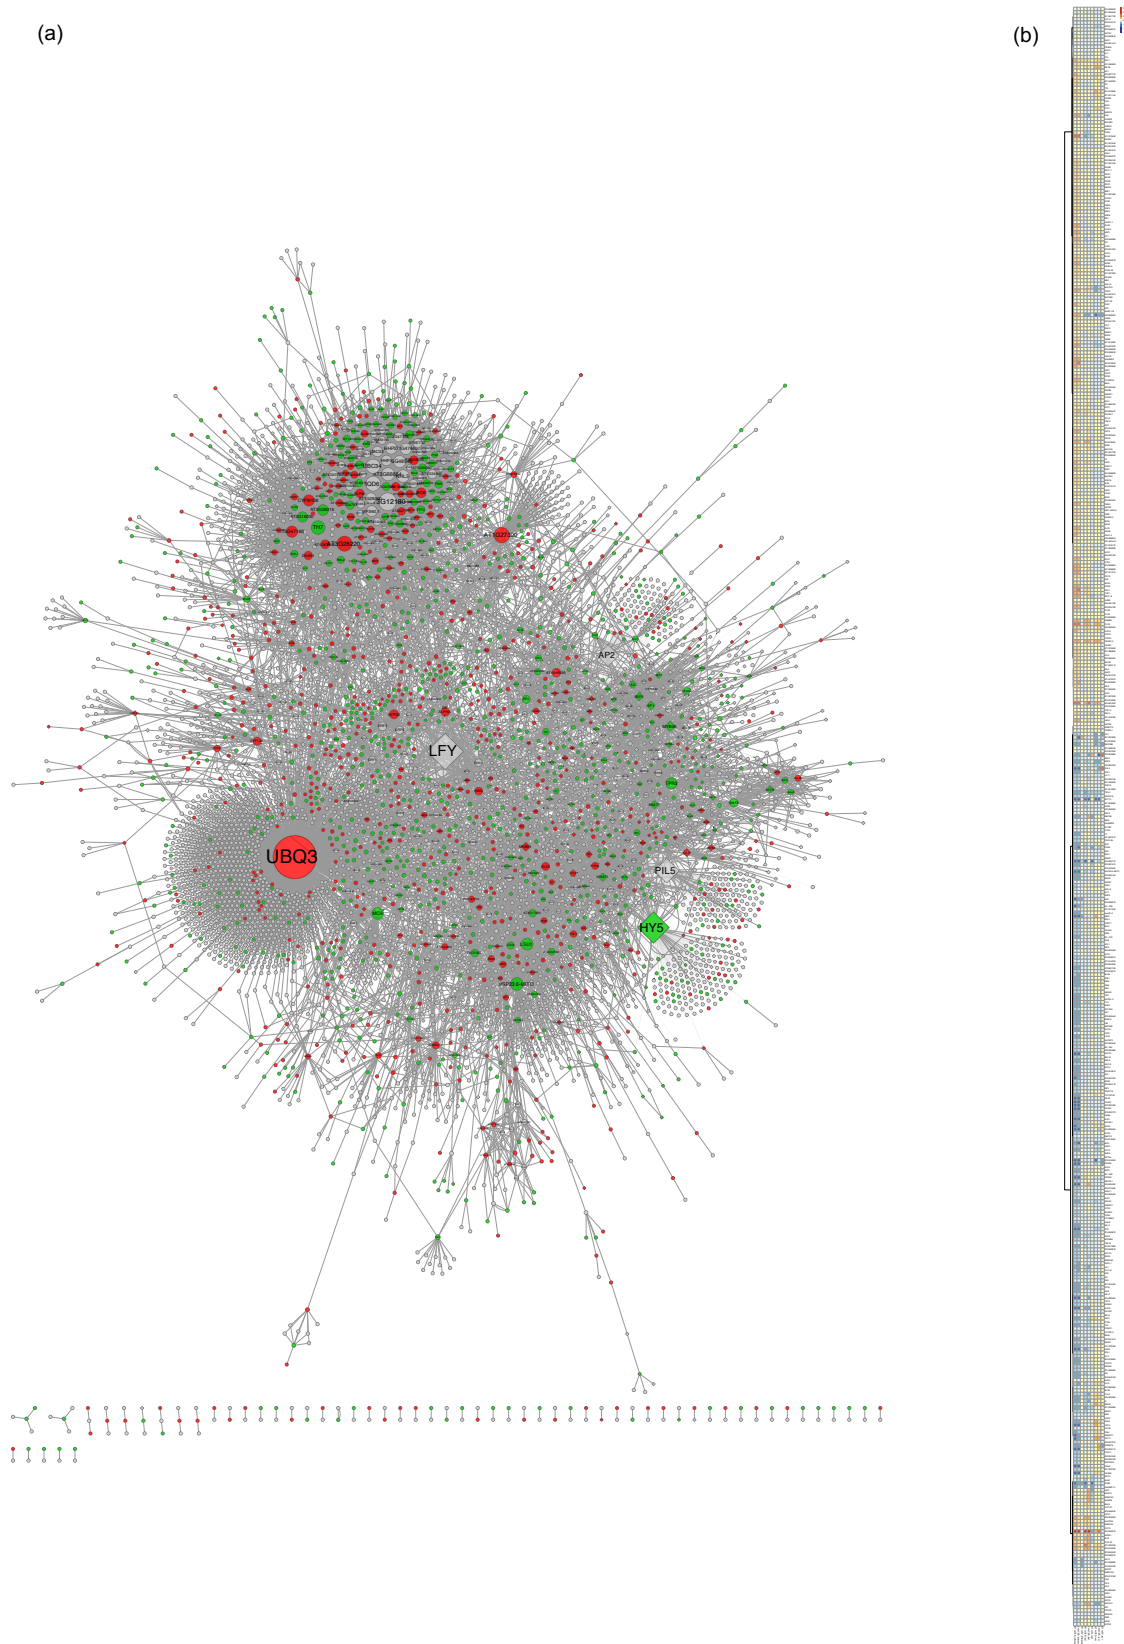

**Figure S25. Network analysis of functional associations of differentially expressed genes within inflorescences.** (a) Network connecting 5650 genes (776 and 992 genes with increased or decreased relative transcript abundance, respectively) by annotated protein-protein and regulatory interactions. (b) Heat map indicating the relative expression of hub

genes with high connectivity ( $> 10$ ) based on their topology coefficients (see Figure 6c for more details).

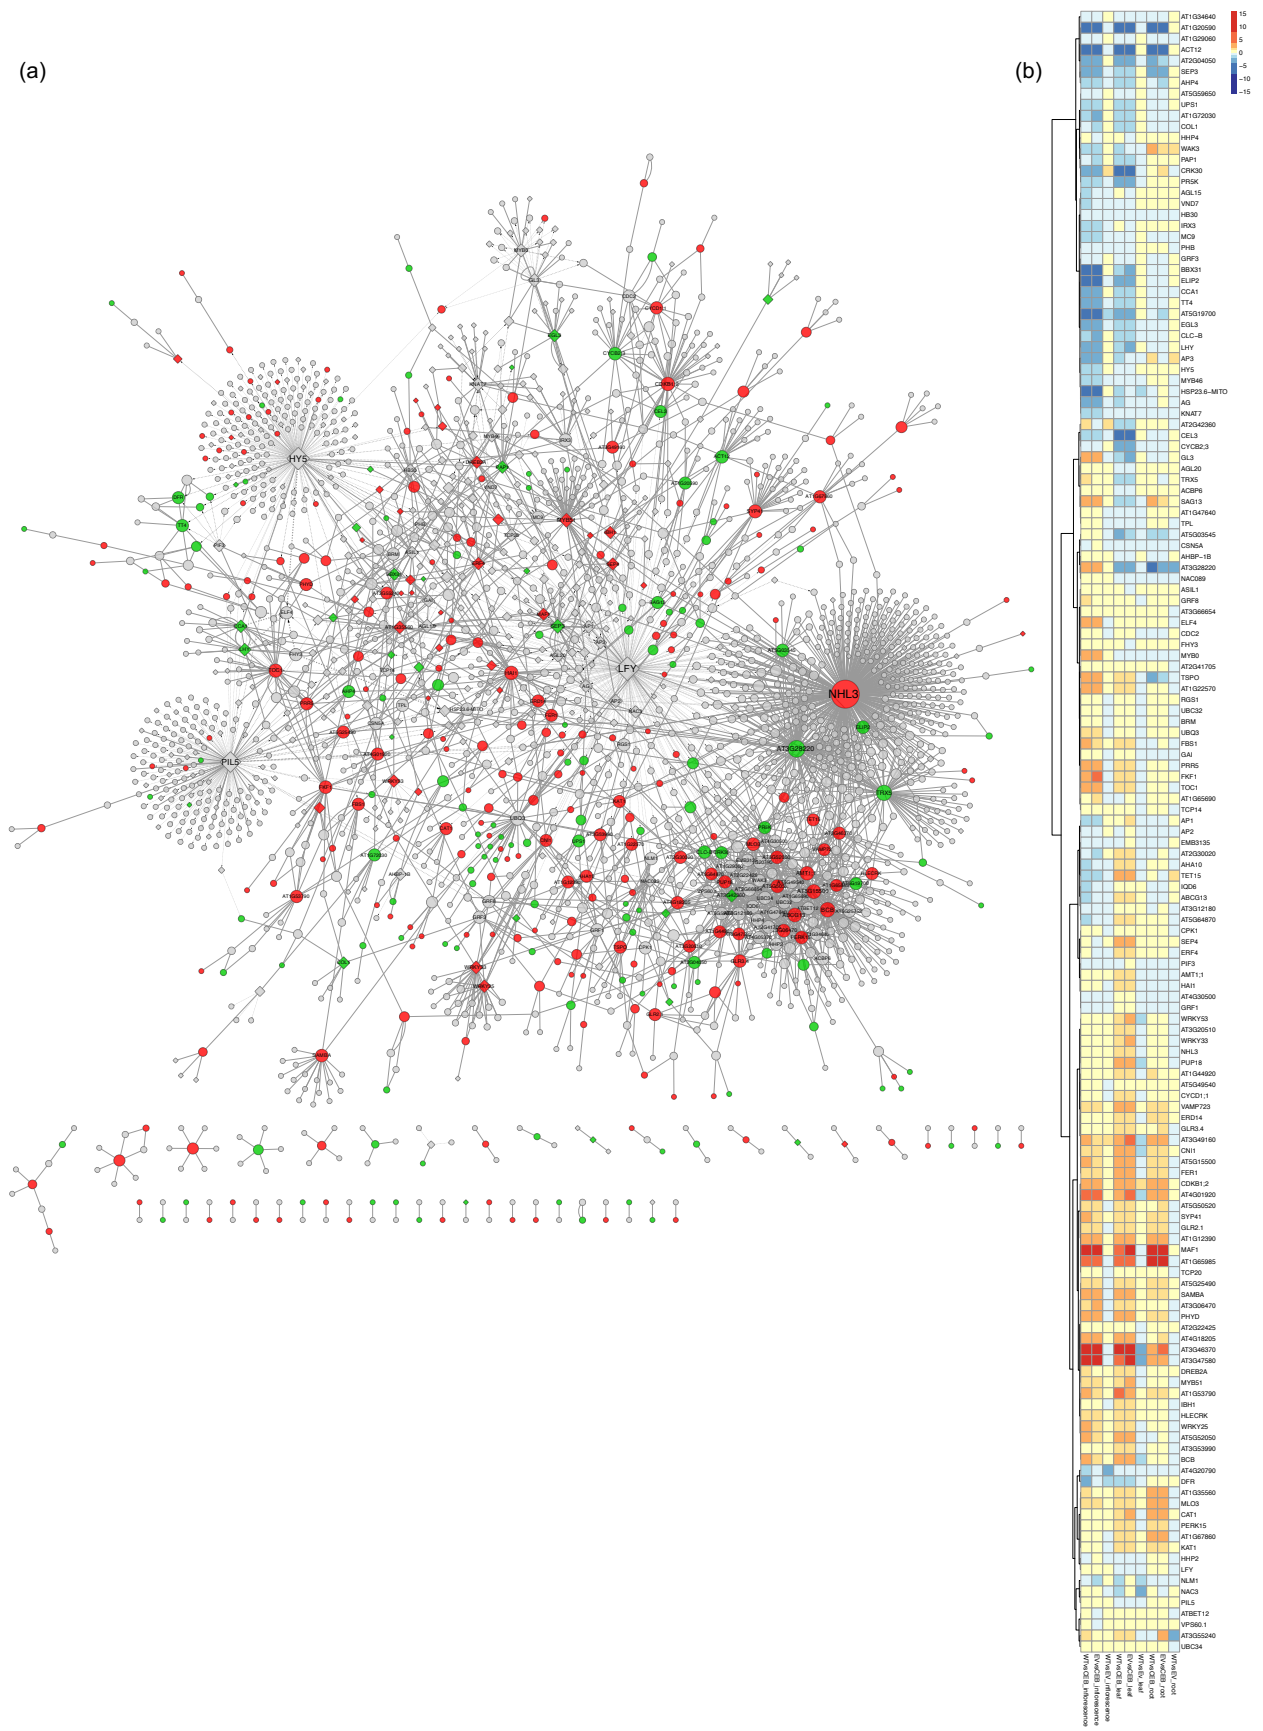

**Figure S26. Network analysis of functional associations of differentially expressed genes within leaves. (a) Network connecting 2189 genes (261 and 149 genes with**

increased or decreased relative transcript abundance, respectively) by annotated protein-protein and regulatory interactions. (b) Heat map indicates the relative expression of hub genes with high connectivity ( $> 7$ ) based on their topology coefficients (see Figure 6c for more details).

(a)

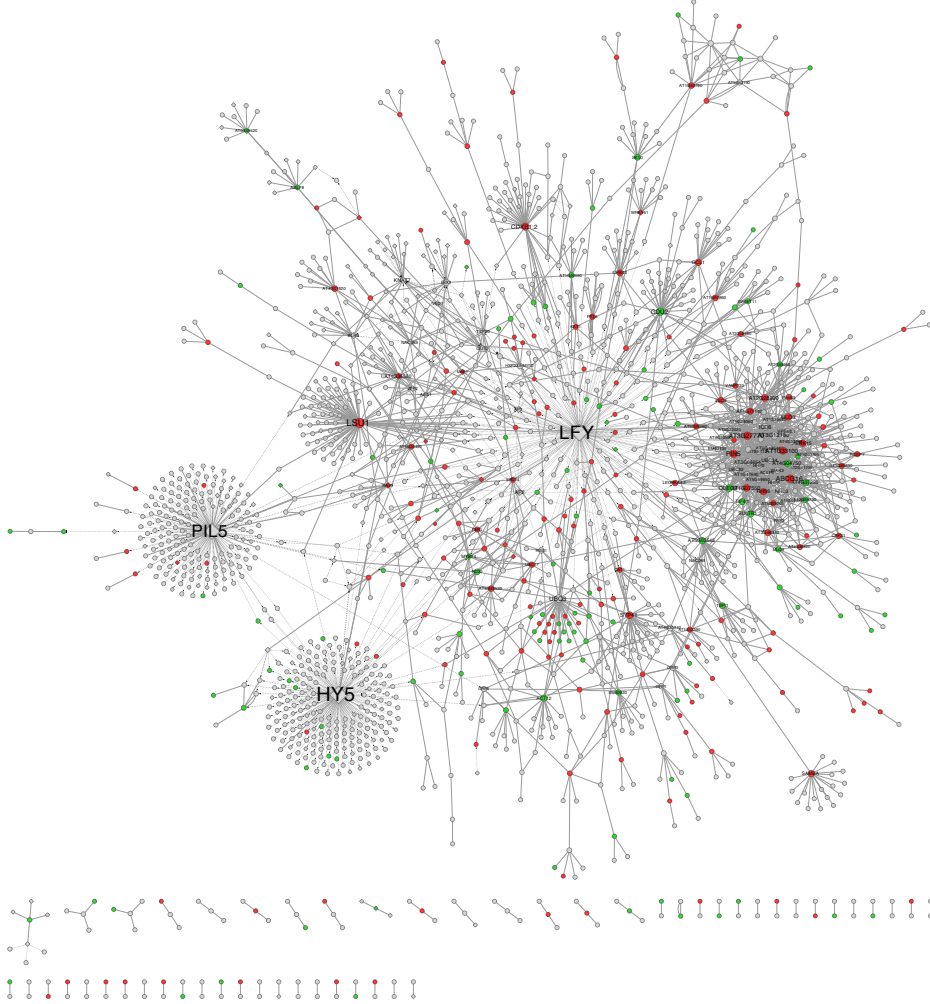

(b)

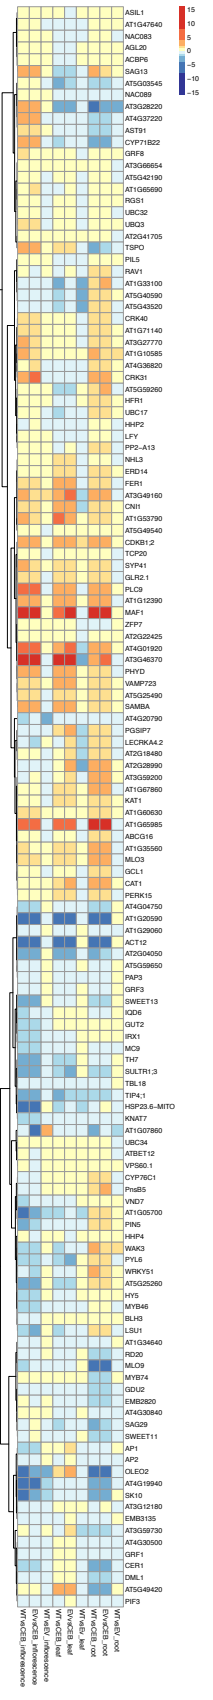



**Figure S27. Network analysis of functional associations of differentially expressed genes within roots.** (a) Network connecting 1794 genes (36 and 20 genes with increased or decreased relative transcript abundance, respectively) by annotated protein-protein and regulatory interactions. (b) Heat map indicates the relative expression of hub genes with high connectivity ( $> 7$ ) based on their topology coefficients (see Figure 6c for more details).
